# Supplementary material
Source: Springer Nature journal article supplement (https://www.springermedizin.de/resource/supplementary/12879_2012_2123_MOESM2_ESM.pdf/9443550)

CD4 < 200 or AIDS
  CD4 = 200-350
  CD4 >= 350
  Missing CD4 and no AIDS

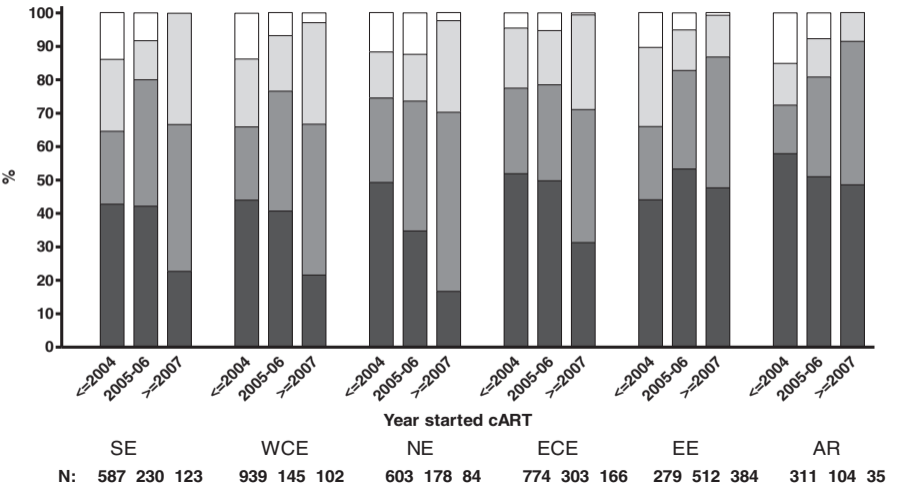

Supplement: MOESM2 [file 9443550]
